# Supplementary material
Source: PubMed Central journal article supplement (PMC3497732)
Supplement: 1209002109_pnas.201209002SI.pdf [file 1209002109_pnas.201209002SI.pdf]

# Supporting Information

Tseng and Prather 10.1073/pnas.1209002109

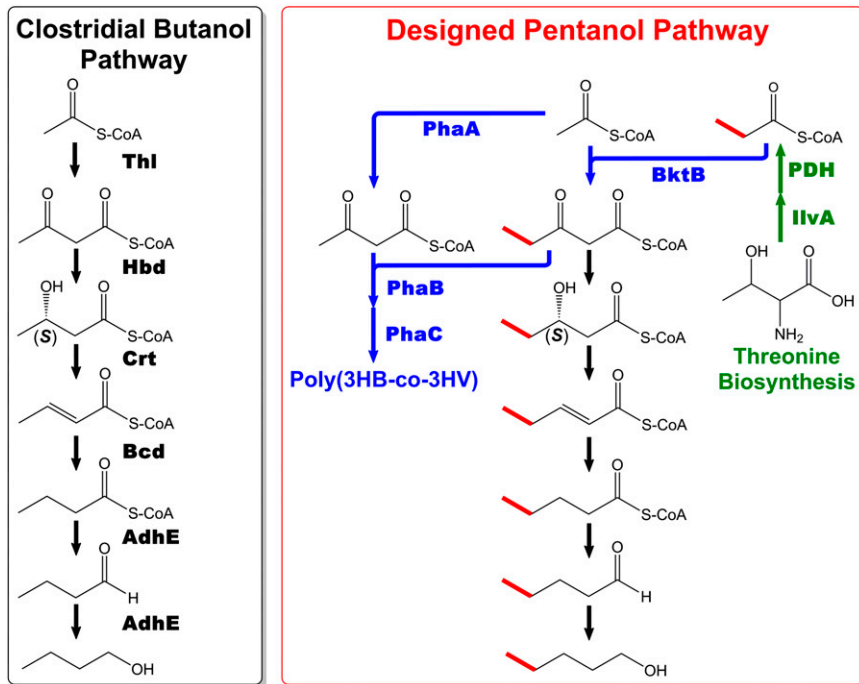

**Fig. S1.** Schematic of the butanol biosynthetic pathway (*Left*), poly(3HB-co-3HV) biosynthetic pathway (in blue), threonine biosynthetic pathway (in green), and designed pentanol biosynthetic pathway (*Right*). Pentanol synthesis starts from condensation of one acetyl-CoA with one propionyl-CoA, instead of two acetyl-CoA molecules, to establish a five-carbon skeleton.

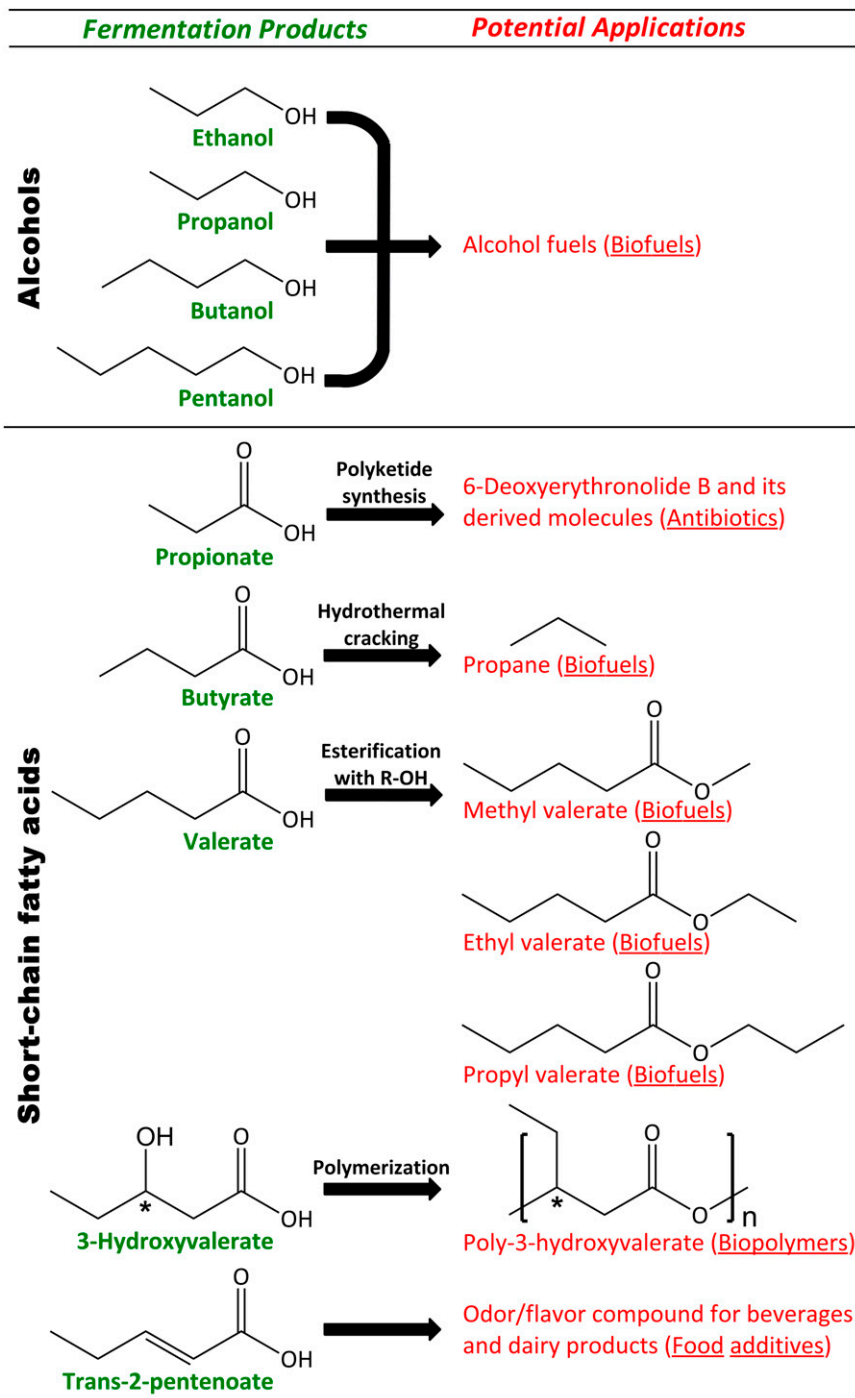

Fig. S2. Applications of various fermentation products synthesized from recombinant *Escherichia coli* strains carrying different combinations of pentanol pathway and CoA-activation/removing toolkit enzymes.

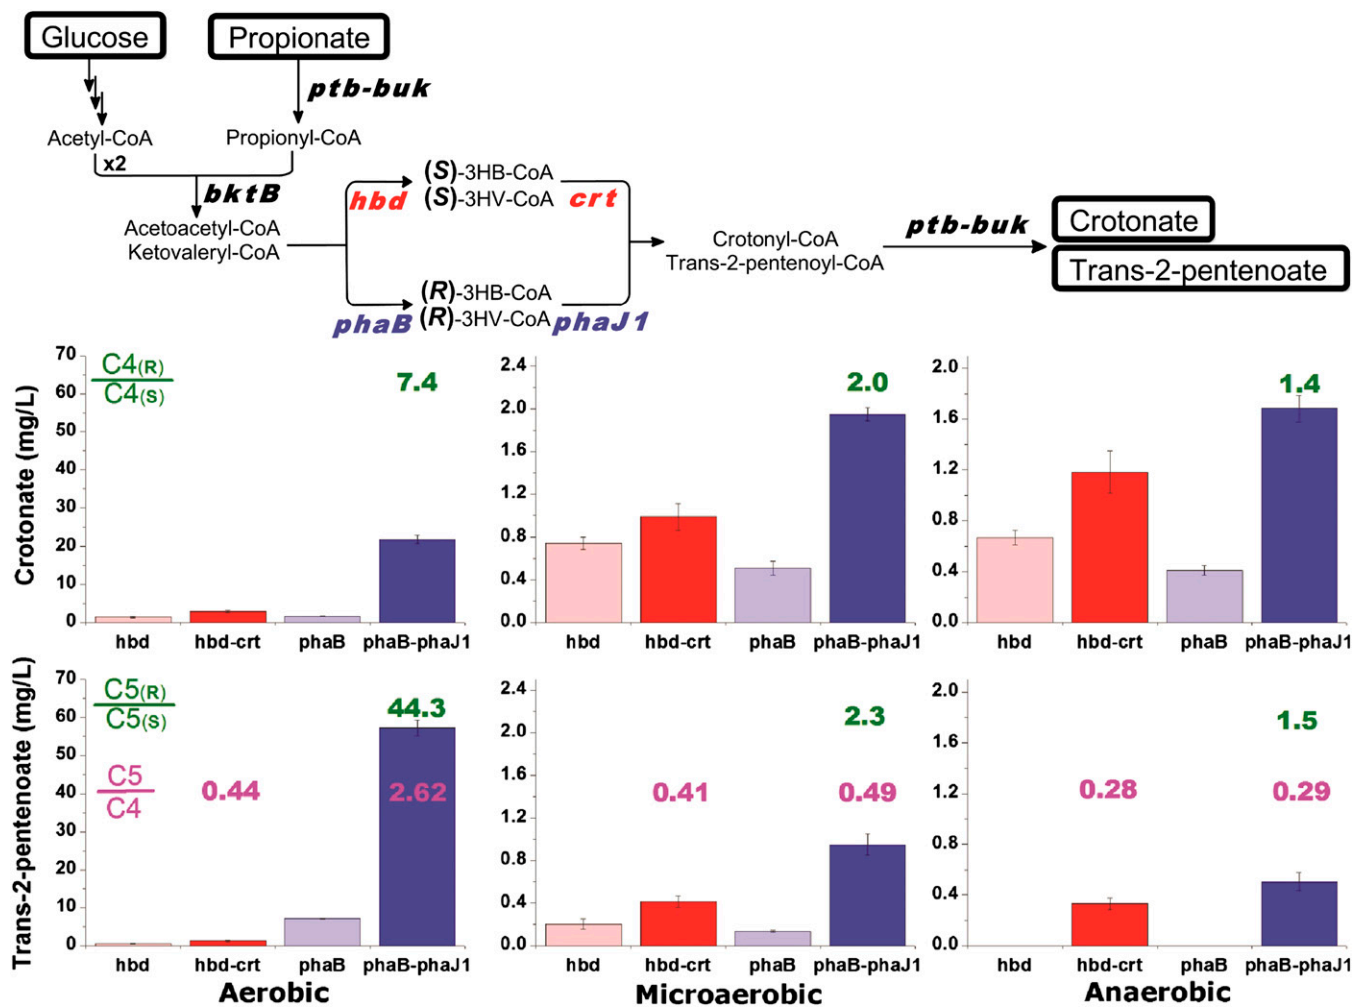

Fig. S3. Schematic of trans-2-pentenoate biosynthetic pathway (Upper) and titers of products synthesized by recombinant *E. coli* grown under various conditions (Lower). All constructs contain *ptb-buk* and *bktB* in addition to the genes indicated under each bar. The symbols of C4 and C5 denote crotonate and trans-2-pentenoate, respectively. Ratios of titers from *phaB-phaJ1* constructs to titers from *hbd-crt* constructs are shown in green and ratios of trans-2-pentenoate titers to crotonate titers are shown in pink. Cells were grown in TB supplemented with 10 g/L glucose and 20 mM propionate, and incubated at 30 °C for 24 h. For the ratios of product titers from *phaB-phaJ1* constructs to those from *hbd-crt*, a value larger than 1 suggests that the *R*-pathway outperforms the *S*-pathway, which was the case under aerobic conditions. On the other hand, the ratio was close to one under anaerobic conditions, suggesting that the difference between the *R*- and *S*-pathway became smaller. For the ratios of trans-2-pentenoate titers to crotonate titers, the values also dropped when culture condition changes from aerobic to anaerobic. The difference in the two ratios between the *R*- and *S*-pathway implicates a correlation between oxygen availability and *R*- and *S*-pathway activities, to explain which, a hypothesis is proposed in Fig. S4.

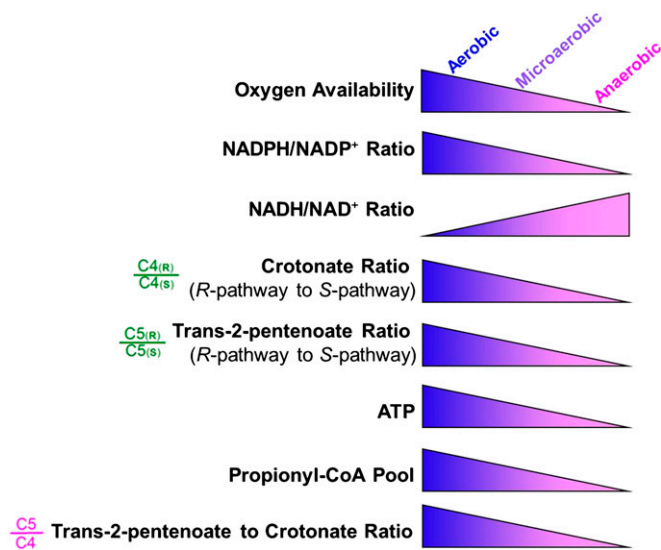

**Fig. S4.** Schematic representation of correlations between dissolved oxygen and various variables (cofactor ratios, ATP, and observed product ratios). The results of trans-2-pentenoate synthesis from glucose and glycerol under aerobic, microaerobic, and anaerobic culture conditions suggest that there may exist a correlation between oxygen availability and *R*- and *S*-pathway activities, to explain which a hypothesis was proposed. As generally known, the NADPH/NADP<sup>+</sup> ratio is positively correlated with DOT (dissolved oxygen tension) but the NADH/NAD<sup>+</sup> ratio is inversely correlated with DOT, so we would expect the NADPH-dependent *R*-pathway to outperform the NADH-dependent *S*-pathway under aerobic conditions, resulting in larger crotonate ratios (*R*-pathway to *S*-pathway) and trans-2-pentenoate ratios (*R*-pathway to *S*-pathway) (Fig. S3). Under anaerobic conditions, the trend of cofactor ratios reverses, and the difference in performance between the two pathways should become smaller, which is consistent with our observations. In addition, we suspected that the activation of propionate is also affected by DOT as its activation by Ptb-Buk requires ATP, the amount of which is positively correlated with DOT. Thus, a larger propionyl-CoA pool could be expected under the aerobic conditions, thus favoring the condensation reaction of acetyl-CoA with propionyl-CoA, and consequently resulting in larger trans-2-pentenoate to crotonate ratios (Fig. S3). These observations gave insights into optimization of culture conditions, motivating us to profile various headspace to culture volume ratios for production of butanol (Fig. S8).

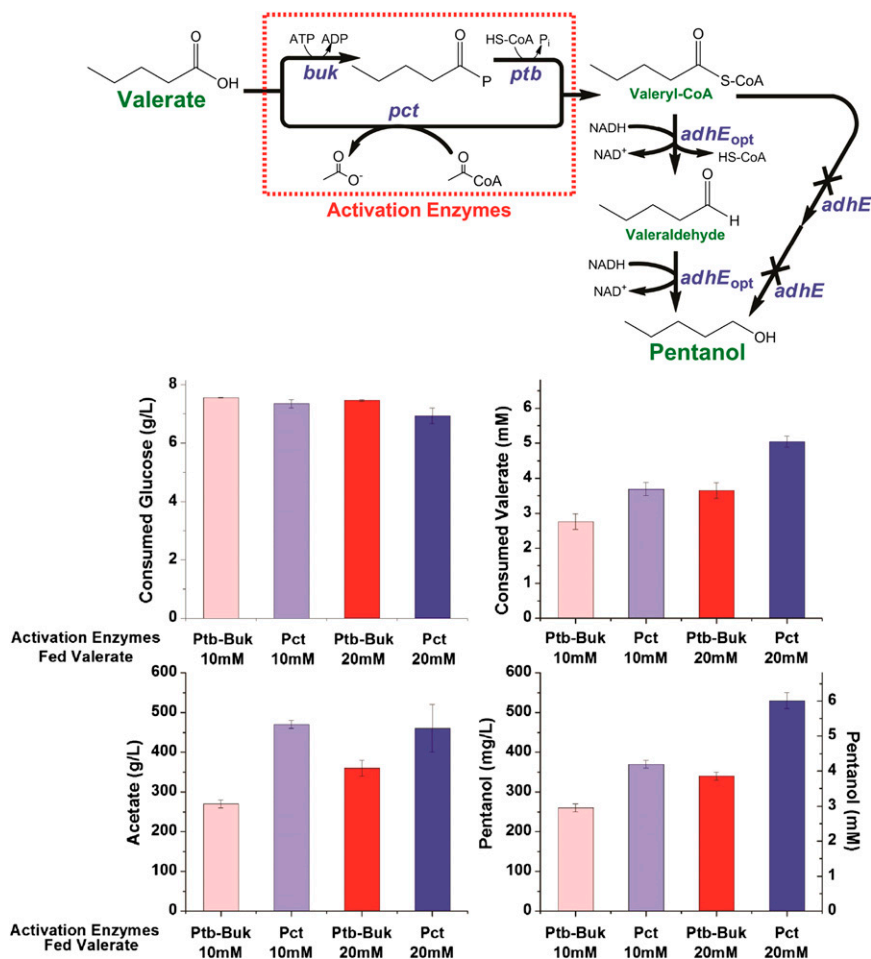

**Fig. S5.** Schematic diagram of pentanol synthesis from valerate and titers of substrates consumed and products synthesized by recombinant *E. coli*. Two activators, including PtB-Buk and Pct, and two feed concentrations of valerate, were compared. The *adhE<sub>opt</sub>* gene was overexpressed in all constructs. Stains using Pct as the CoA-activator were found to consume more valerate and produce more pentanol compared with stains using PtB-Buk as CoA-activator. Pentanol titers were further boosted when the valerate substrate concentration was increased from 10 mM to 20 mM. Overall, the results suggest that the AdhE enzyme, expressed from the codon-optimized *adhE<sub>opt</sub>*, was able to catalyze the reaction of valeryl-CoA to pentanol.

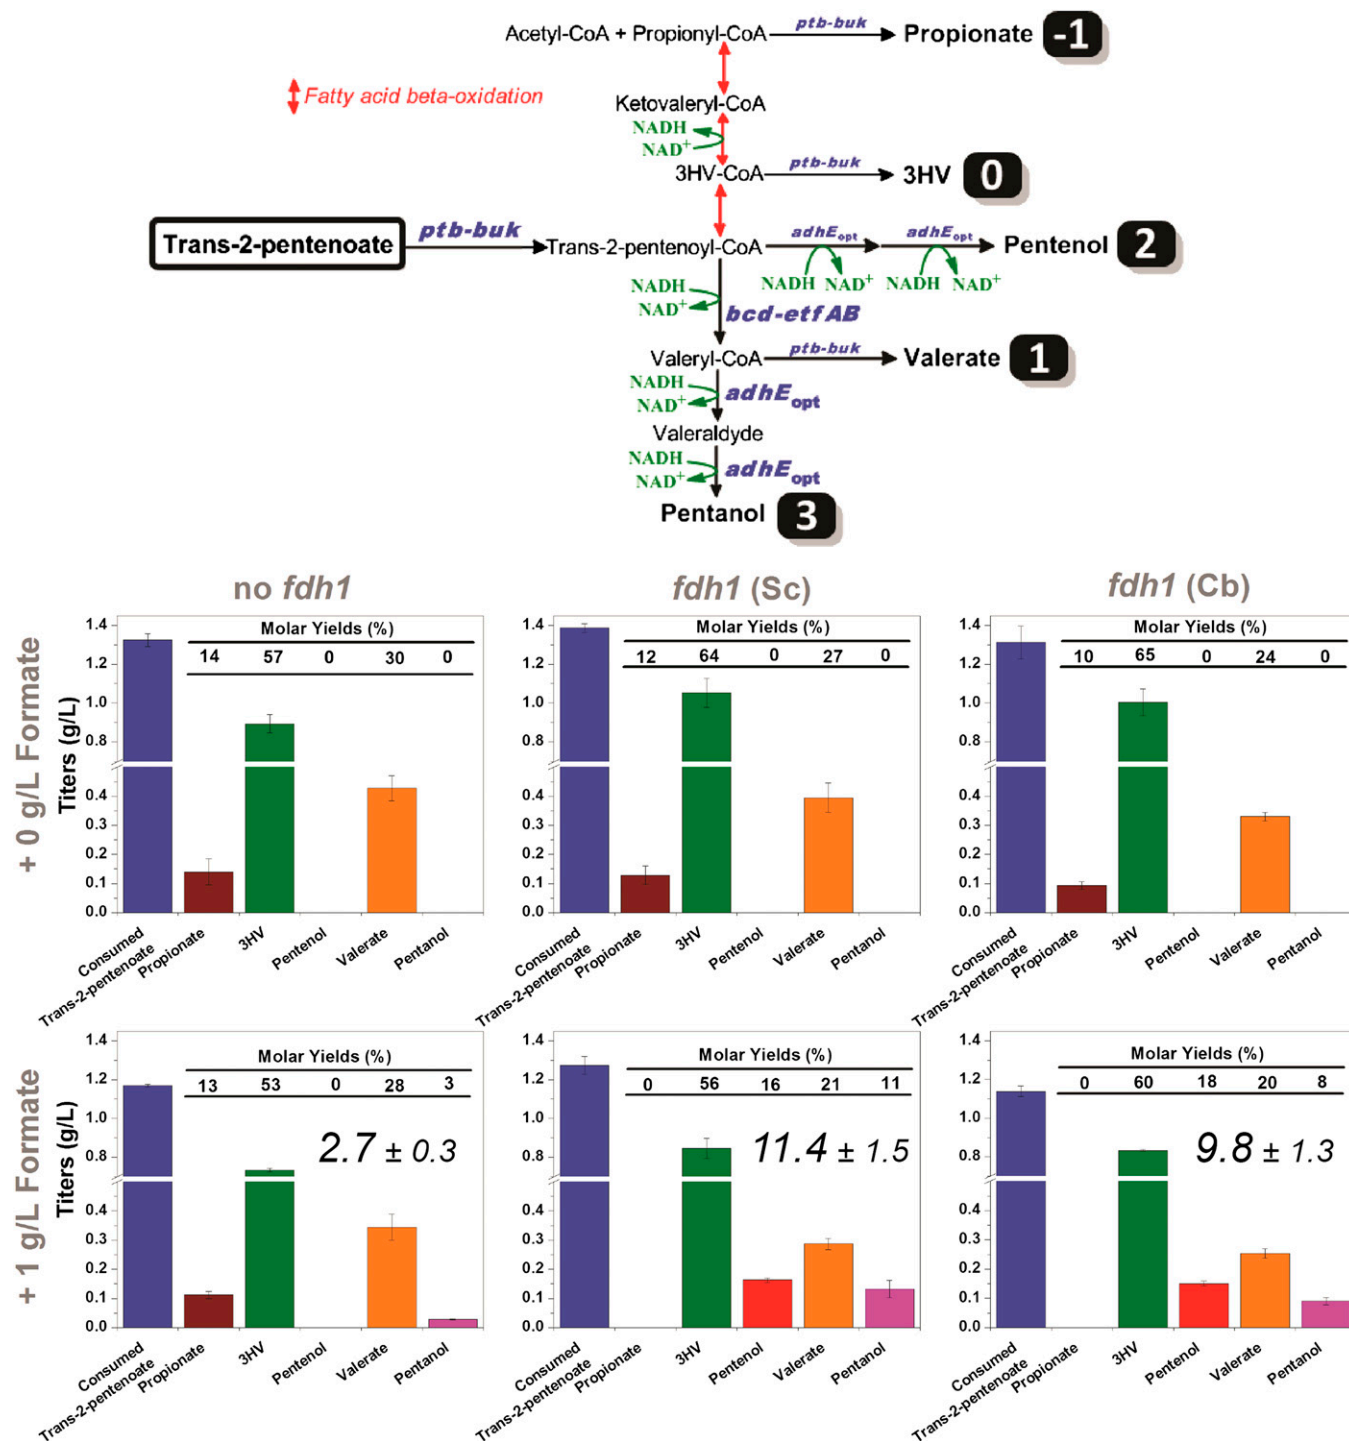

**Fig. S6.** Schematic diagram of pentanol synthesis from trans-2-pentenoate and titers of products resulting from the feeding of trans-2-pentenoate. All relevant products coming from trans-2-pentenoate are shown. Genes of *ptb-buk*, *bcd-etfAB*, and *adhE<sub>opt</sub>* were overexpressed. Two formate dehydrogenases (encoded by *fdh1* with codon-optimization) from *Saccharomyces cerevisiae* and *Candida boidinii* were overexpressed to increase NADH availability. The effect of supplementation with 1 g/L formate was also compared. To quantify the effect of overexpression of *fdh1*, one number was assigned to each product based on its relative redox state, for example, "2" for pentenol synthesized from trans-2-pentenoyl-CoA requires 2 mol of NADH, and "-1" for propionate synthesized from trans-2-pentenoyl-CoA generates 1 mol of NADH. Next, we calculated the total NADH used for product formation, which is the summation of products of multiplying the relative redox value by the product titer. The calculated total NADH used for product formation is shown within each of the bottom three plots. Clearly, the overexpression of *fdh1* with supplementation of formate increased the NADH availability within the cells as the total NADH used for product formation increased from 2.7 in the no-*fdh1* control to 11.4 and 9.8 in cells expressing *S. cerevisiae fdh1* and *C. boidinii fdh1*, respectively. Additionally, the observation of production of valerate and pentanol in the *bcd-etfAB* containing strain suggest that the Bcd enzyme used in the bottom pentanol pathway can transform trans-2-pentenoyl-CoA, a five-carbon substrate, to valeryl-CoA.

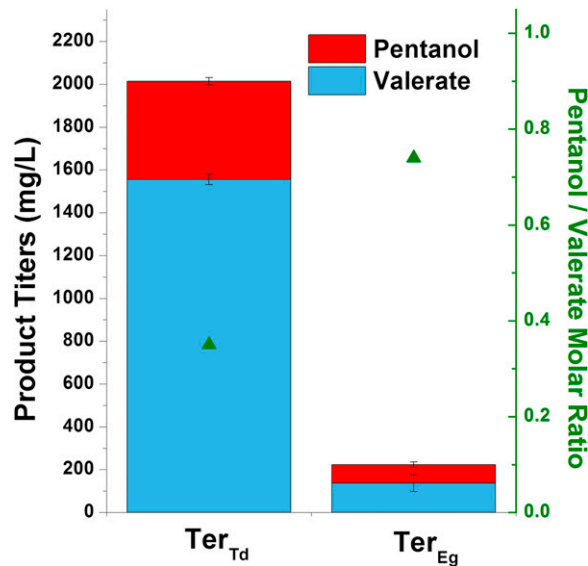

**Fig. S7.** Comparison of the two Ter enzymes from *Treponema denticola* and *Euglena gracilis* on pentanol synthesis. The Ter<sub>Td</sub> enzyme obviously outperformed the Ter<sub>Eg</sub> enzyme in converting trans-2-pentenoyl-CoA to valeryl-CoA, resulting in more valerate and pentanol despite its incapability of catalyzing hexanoyl-CoA, a C6 substrate, based on a reported in vitro enzyme assay result (1). The *fdh1<sub>sc</sub>* gene was overexpressed in both strains along with supplementation of 1 g/L formate.

1. Tucci S, Martin W (2007) A novel prokaryotic trans-2-enoyl-CoA reductase from the spirochete *Treponema denticola*. *FEBS Lett* 581(8):1561–1566.

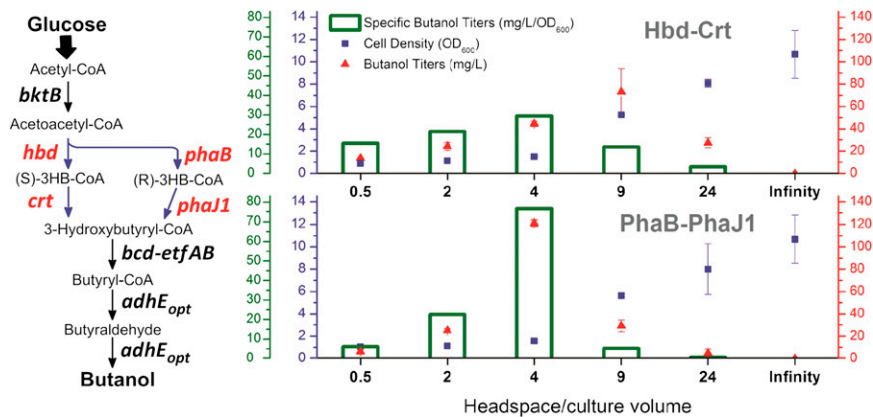

**Fig. S8.** Butanol synthesis from glucose via newly constructed pentanol pathways. This figure shows butanol titers, specific titers, and cell densities from cultures of recombinant *E. coli* containing the pentanol pathways. Cells were grown under various culture conditions with different ratios of headspace to culture volume for 48 h. Two routes, including the *hbd-crt* route (Upper, strain Pa15) and the *phaB-phaJ1* (Lower, strain Pa16) route, were compared. In general, strains containing either R- or S- pentanol biosynthetic pathway produced butanol, achieving the highest butanol specific titers at a headspace to culture volume ratio of 4.

**Table S1. Comparison of physical-chemical properties of various biofuels and gasoline**

| Fuels      | Air-fuel ratio | Vapor pressure (psi) | Energy density (MJ/kg) | Fits current infrastructure? |
|------------|----------------|----------------------|------------------------|------------------------------|
| Gasoline   | 14.6           | 0.1–30               | 42.7                   | Yes                          |
| Ethanol    | 9.0            | 1.1                  | 29.7                   | No                           |
| Butanol    | 11.2           | 0.077                | 36.1                   | Yes                          |
| Isobutanol | 11.2           | 0.17                 | 36.1                   | Yes                          |
| Pentanol   | 12.5           | 0.039                | 37.7                   | Yes                          |

Although ethanol represents an initial success as a biofuel because of its high production yield and efficiency, it does not compare favorably to gasoline. Ethanol has a lower energy density (~34% less energy per unit volume than gasoline, resulting in a 34% reduction in miles per gallon), a low vapor pressure, and a high hygroscopicity, possibly leading to corrosion in pipelines and engines. Furthermore, ethanol raises the vapor pressure of the mixture when blended to gasoline, although this is partially offset by an increase in octane number. In contrast, advanced biofuels, including butanol, isobutanol, and pentanol, have better physical-chemical properties, such as higher energy densities, low hygroscopicities as well as lower vapor pressure for gasoline blends. Although the octane number of l-butanol is slightly less than gasoline, branched-chain isomers, such as isobutanol, have higher octane numbers, allowing for more flexibility in fuel design. Furthermore, as carbon length increases, the amount of air needed to combust unit amount of fuel also increases. Because standard gasoline engines can only adjust the air-fuel ratio to accommodate variations in the fuel within certain limits, the closer to 14.6 the air-fuel ratio of the fuels, the better the engine's efficiency. Therefore, long-chain alcohols are preferable fuel alternatives. Perry's handbook (1) and [www2.dupont.com/BioFuel/en\\_US/index.html](http://www2.dupont.com/BioFuel/en_US/index.html).

1. Perry R, Green D (2007) *Perry's Chemical Engineers' Handbook* (McGraw-Hill, New York).



**Table S2. List of strains and plasmids used in this work**

| Strain or plasmid                 | Relevant genotype                                                                                                                                                                               | Ref.          |
|-----------------------------------|-------------------------------------------------------------------------------------------------------------------------------------------------------------------------------------------------|---------------|
| Strain                            |                                                                                                                                                                                                 |               |
| DH10B                             | <i>F<sup>-</sup> mcrA Δ(mrr-hsdRMS-mcrBC) ψ80lacZΔM15 ΔlacX74 recA1 endA1 araD139Δ (ara, leu)7697 galU galK λ<sup>-</sup> rpsL nupG</i>                                                         | Invitrogen    |
| ElectroTen-Blue                   | <i>Δ (mcrA)183 Δ (mcrCB-hsdSMR-mrr)173 endA1 supE44 thi-1 recA1 gyrA96 relA1 lac Kan<sup>r</sup> [F<sup>+</sup> proAB lacI<sup>q</sup>ZΔM15 Tn10 (Tet<sup>r</sup>)]</i>                         | Stratagene    |
| BL21Star(DE3)                     | <i>F<sup>-</sup> ompT hsdSB (rB<sup>-</sup> mB<sup>-</sup>) gal dcm rne131 (DE3)</i>                                                                                                            | Invitrogen    |
| Module 3                          |                                                                                                                                                                                                 |               |
| BL1                               | pCDF/ptb-buk + pACYC/adhE                                                                                                                                                                       | Present study |
| BL2                               | pCDF/ptb-buk + pACYC/adhE <sub>opt</sub>                                                                                                                                                        | Present study |
| BL3                               | pCDF/pct + pACYC/adhE                                                                                                                                                                           | Present study |
| BL4                               | pCDF/pct + pACYC/adhE <sub>opt</sub>                                                                                                                                                            | Present study |
| BL5                               | pCDF/pct + pACYC/yiaY                                                                                                                                                                           | Present study |
| BL6                               | pET/bcd-ETFAB/adhE <sub>opt</sub> + pCDF/ptb-buk                                                                                                                                                | Present study |
| BL7                               | pET/bcd-ETFAB/adhE <sub>opt</sub> + pCDF/ptb-buk/fdh1 <sub>sc</sub>                                                                                                                             | Present study |
| BL8                               | pET/bcd-ETFAB/adhE <sub>opt</sub> + pCDF/ptb-buk/fdh1 <sub>cb</sub>                                                                                                                             | Present study |
| BL9                               | pET/Ter <sub>Td</sub> /adhE <sub>opt</sub> + pCDF/ptb-buk/fdh1 <sub>sc</sub>                                                                                                                    | Present study |
| BL10                              | pET/Ter <sub>Eg</sub> /adhE <sub>opt</sub> + pCDF/ptb-buk/fdh1 <sub>sc</sub>                                                                                                                    | Present study |
| BL11                              | pET/Ter <sub>Td</sub> /adhE <sub>opt</sub> + pCDF/ptb-buk/fdh1 <sub>sc</sub> + pACYCDuet-1                                                                                                      | Present study |
| BL12                              | pET/Ter <sub>Td</sub> /adhE <sub>opt</sub> + pCDF/ptb-buk/fdh1 <sub>sc</sub> + pACYC/aceEF-lpd <sub>101</sub>                                                                                   | Present study |
| MG1655                            | <i>F<sup>-</sup> λ<sup>-</sup> ilvG- rfb-50 rph-1</i>                                                                                                                                           | ATCC 700926   |
| Pal(DE3)                          | MG1655(DE3 <i>Δpta ΔldhA ΔadhE ΔmdhA</i> )                                                                                                                                                      | (1)           |
| Module 2                          |                                                                                                                                                                                                 |               |
| Pal1                              | pET/bktB/hbd + pCDF/ptb-buk/crt                                                                                                                                                                 | Present study |
| Pal2                              | pET/bktB/hbd + pCDF/ptb-buk                                                                                                                                                                     | Present study |
| Pal3                              | pET/bktB/phaB + pCDF/ptb-buk/phaJ1                                                                                                                                                              | Present study |
| Pal4                              | pET/bktB/phaB + pCDF/ptb-buk                                                                                                                                                                    | Present study |
| Pal5                              | pET/bcd-ETFAB/bktB + pCDF/crt/hbd + pACYC/adhE <sub>opt</sub>                                                                                                                                   | Present study |
| Pal6                              | pET/bcd-ETFAB/bktB + pCDF/phaJ1/phaB + pACYC/adhE <sub>opt</sub>                                                                                                                                | Present study |
| Module 2+3                        |                                                                                                                                                                                                 |               |
| Pal7                              | pETDuet-1 + pCDFDuet-1 + pACYCDuet-1                                                                                                                                                            | Present study |
| Pal8                              | pET/bcd-ETFAB/bktB/pct + pCDF/crt/hbd + pACYC/fdh1 <sub>sc</sub> /adhE <sub>opt</sub>                                                                                                           | Present study |
| Pal9                              | pET/bcd-ETFAB/bktB/pct + pCDF/crt/hbd + pACYC/fdh1 <sub>cb</sub> /adhE <sub>opt</sub>                                                                                                           | Present study |
| Pal10                             | pET/Ter <sub>Td</sub> /bktB/pct + pCDF/crt/hbd + pACYC/fdh1 <sub>sc</sub> /adhE <sub>opt</sub>                                                                                                  | Present study |
| Pal11                             | pET/Ter <sub>Td</sub> /bktB/pct + pCDF/crt/hbd + pACYC/fdh1 <sub>sc</sub> /aceEF-lpd <sub>101</sub> /adhE <sub>opt</sub>                                                                        | Present study |
| Pal12                             | pET/Ter <sub>Td</sub> /bktB/pct + pCDF/crt/hbd + pACYC/fdh1 <sub>sc</sub> /aceEF-lpd <sub>101</sub>                                                                                             | Present study |
| Pal13                             | pET/bcd-ETFAB/bktB/pct + pCDF/phaJ1/phaB + pACYC/fdh1 <sub>sc</sub> /adhE <sub>opt</sub>                                                                                                        | Present study |
| Pal14                             | pET/bcd-ETFAB/bktB/pct + pCDF/phaJ1/phaB + pACYC/fdh1 <sub>cb</sub> /adhE <sub>opt</sub>                                                                                                        | Present study |
| Pal15                             | pET/Ter <sub>Td</sub> /bktB/pct + pCDF/phaJ1/phaB + pACYC/fdh1 <sub>sc</sub> /adhE <sub>opt</sub>                                                                                               | Present study |
| Pal16                             | pET/Ter <sub>Td</sub> /bktB/pct + pCDF/phaJ1/phaB + pACYC/fdh1 <sub>sc</sub> /aceEF-lpd <sub>101</sub> /adhE <sub>opt</sub>                                                                     | Present study |
| Module 1+2+3                      |                                                                                                                                                                                                 |               |
| Pal17                             | pET/bcd-ETFAB/bktB + pCDF/crt/hbd + pACYC/adhE <sub>opt</sub> + pCOLA/thrA <sup>fr</sup> BC/ilvA <sup>fr</sup>                                                                                  | Present study |
| Pal18                             | pET/bcd-ETFAB/bktB + pCDF/crt/hbd + pACYC/fdh1 <sub>sc</sub> /adhE <sub>opt</sub> + pCOLA/thrA <sup>fr</sup> BC/ilvA <sup>fr</sup>                                                              | Present study |
| Pal19                             | pET/bcd-ETFAB/bktB + pCDF/crt/hbd + pACYC/fdh1 <sub>cb</sub> /adhE <sub>opt</sub> + pCOLA/thrA <sup>fr</sup> BC/ilvA <sup>fr</sup>                                                              | Present study |
| Pal20                             | pET/bcd-ETFAB/bktB + pCDF/phaJ1/phaB + pACYC/adhE <sub>opt</sub> + pCOLA/thrA <sup>fr</sup> BC/ilvA <sup>fr</sup>                                                                               | Present study |
| Pal21                             | pET/bcd-ETFAB/bktB + pCDF/phaJ1/phaB + pACYC/fdh1 <sub>sc</sub> /adhE <sub>opt</sub> + pCOLA/thrA <sup>fr</sup> BC/ilvA <sup>fr</sup>                                                           | Present study |
| Pal22                             | pET/bcd-ETFAB/bktB + pCDF/phaJ1/phaB + pACYC/fdh1 <sub>cb</sub> /adhE <sub>opt</sub> + pCOLA/thrA <sup>fr</sup> BC/ilvA <sup>fr</sup>                                                           | Present study |
| Pal23                             | pET/Ter <sub>Td</sub> /bktB + pCDF/crt/hbd + pACYC/fdh1 <sub>sc</sub> /aceEF-lpd <sub>101</sub> /adhE <sub>opt</sub> + pCOLA/thrA <sup>fr</sup> BC/ilvA <sup>fr</sup>                           | Present study |
| Pal24                             | pET/Ter <sub>Td</sub> /bktB + pCDF/crt/hbd + pACYC/fdh1 <sub>sc</sub> /aceEF-lpd <sub>101</sub> + pCOLA/thrA <sup>fr</sup> BC/ilvA <sup>fr</sup>                                                | Present study |
| Pal25                             | pCDF/tesB + pCOLA/thrA <sup>fr</sup> BC/ilvA <sup>fr</sup>                                                                                                                                      | Present study |
| Pal(DE3 <i>Δmdh</i> )             | MG1655(DE3 <i>Δpta ΔldhA ΔadhE Δmdh</i> )                                                                                                                                                       |               |
| Palm1                             | pET/Ter <sub>Td</sub> /bktB + pCDF/crt/hbd + pACYC/fdh1 <sub>sc</sub> / aceEF-lpd <sub>101</sub> /adhE <sub>opt</sub> + pCOLA/thrA <sup>fr</sup> BC/ilvA <sup>fr</sup>                          | Present study |
| Pal(DE3 <i>ΔtesB</i> )            | MG1655(DE3 <i>Δpta ΔldhA ΔadhE ΔtesB</i> )                                                                                                                                                      |               |
| Palt1                             | pET/Ter <sub>Td</sub> /bktB + pCDF/crt/hbd + pACYC/fdh1 <sub>sc</sub> / aceEF-lpd <sub>101</sub> /adhE <sub>opt</sub> + pCOLA/thrA <sup>fr</sup> BC/ilvA <sup>fr</sup>                          | Present study |
| Plasmid                           |                                                                                                                                                                                                 |               |
| pETDuet-1                         | ColE1(pBR322) <i>ori, lacI, T7lac, Amp<sup>R</sup></i>                                                                                                                                          | Novagen       |
| pET/bcd-ETFAB/bktB                | pETDuet-1 harboring <i>bcd-ETFAB</i> operon from <i>Clostridium acetobutylicum</i> ATCC 824, and <i>bktB</i> from <i>Cupriavidus necator</i> (formerly known as <i>Ralstonia eutropha</i> ) H16 | Present study |
| pET/bcd-ETFAB/bktB/pct            | pETDuet-1 harboring <i>bcd-ETFAB</i> operon from <i>C. acetobutylicum</i> ATCC 824, <i>bktB</i> from <i>C. necator</i> H16, and <i>pct</i> from <i>Megasphaera elsdenii</i>                     | Present study |
| pET/bcd-ETFAB/adhE <sub>opt</sub> | pETDuet-1 harboring <i>bcd-ETFAB</i> operon and codon-optimized <i>adhE<sub>opt</sub></i> from <i>C. acetobutylicum</i> ATCC 824                                                                | Present study |

Table S2. Cont.

| Strain or plasmid                                                        | Relevant genotype                                                                                                                                                                                                                     | Ref.          |
|--------------------------------------------------------------------------|---------------------------------------------------------------------------------------------------------------------------------------------------------------------------------------------------------------------------------------|---------------|
| pET/Ter <sub>Td</sub> /bktB                                              | pETDuet-1 harboring <i>ter</i> from <i>T. denticola</i> , and <i>bktB</i> from <i>C. necator</i> H16                                                                                                                                  | Present study |
| pET/Ter <sub>Td</sub> /bktB/pct                                          | pETDuet-1 harboring <i>ter</i> from <i>T. denticola</i> , <i>bktB</i> from <i>C. necator</i> H16, and <i>pct</i> from <i>M. elsdenii</i>                                                                                              | Present study |
| pET/Ter <sub>Td</sub> /adhE <sub>opt</sub>                               | pETDuet-1 harboring <i>ter</i> from <i>T. denticola</i> , and codon-optimized <i>adhE</i> <sub>opt</sub> from <i>C. acetobutylicum</i> ATCC 824                                                                                       | Present study |
| pET/Ter <sub>Eg</sub> /adhE <sub>opt</sub>                               | pETDuet-1 harboring <i>ter</i> from <i>E. gracilis</i> , and codon-optimized <i>adhE</i> <sub>opt</sub> from <i>C. acetobutylicum</i> ATCC 824                                                                                        | Present study |
| pET/bktB/hbd                                                             | pETDuet-1 harboring <i>bktB</i> from <i>C. necator</i> H16, and <i>hbd</i> from <i>C. acetobutylicum</i> ATCC 824                                                                                                                     | (2)           |
| pET/bktB/phaB                                                            | pETDuet-1 harboring <i>bktB</i> and <i>phaB</i> from <i>C. necator</i> H16                                                                                                                                                            | (2)           |
| pCDFDuet-1                                                               | pCDFDuet-1 harboring <i>ori</i> , <i>lacI</i> , <i>T7lac</i> , Strep <sup>R</sup>                                                                                                                                                     | Novagen       |
| pCDF/crt/hbd                                                             | pCDFDuet-1 harboring <i>crt</i> and <i>hbd</i> from <i>C. acetobutylicum</i> ATCC 824                                                                                                                                                 | Present study |
| pCDF/phaJ1/phaB                                                          | pCDFDuet-1 harboring <i>phaJ1</i> from <i>P. aeruginosa</i> , and <i>phaB</i> from <i>C. necator</i> H16                                                                                                                              | Present study |
| pCDF/ptb-buk                                                             | pCDFDuet-1 harboring <i>ptb-buk</i> operon from <i>C. acetobutylicum</i> ATCC 824                                                                                                                                                     | (3)           |
| pCDF/ptb-buk/fdh1 <sub>sc</sub>                                          | pCDFDuet-1 harboring <i>ptb-buk</i> operon from <i>C. acetobutylicum</i> ATCC 824, and codon-optimized <i>fdh1</i> from <i>S. cerevisiae</i>                                                                                          | Present study |
| pCDF/ptb-buk/fdh1 <sub>cb</sub>                                          | pCDFDuet-1 harboring <i>ptb-buk</i> operon from <i>C. acetobutylicum</i> ATCC 824, and codon-optimized <i>fdh1</i> from <i>C. boidinii</i>                                                                                            | Present study |
| pCDF/ptb-buk/crt                                                         | pCDFDuet-1 harboring <i>ptb-buk</i> operon and <i>crt</i> from <i>C. acetobutylicum</i> ATCC 824                                                                                                                                      | Present study |
| pCDF /ptb-buk/phaJ1                                                      | pCDFDuet-1 harboring <i>ptb-buk</i> operon from <i>C. acetobutylicum</i> ATCC 824, and <i>phaJ1</i> from <i>P. aeruginosa</i>                                                                                                         | Present study |
| pCDF/pct                                                                 | pCDFDuet-1 harboring <i>pct</i> from <i>M. elsdenii</i>                                                                                                                                                                               | (4)           |
| pCDF/tesB                                                                | pCDFDuet-1 harboring <i>tesB</i> from <i>E. coli</i> MG1655                                                                                                                                                                           | (2)           |
| pACYCDuet-1                                                              | P15A <i>ori</i> , <i>lacI</i> , <i>T7lac</i> , Cm <sup>R</sup>                                                                                                                                                                        | Novagen       |
| pACYC/adhE                                                               | pACYCDuet-1 harboring <i>adhE</i> from <i>C. acetobutylicum</i> ATCC 824                                                                                                                                                              | (3)           |
| pACYC/adhE <sub>opt</sub>                                                | pACYCDuet-1 harboring codon-optimized <i>adhE</i> <sub>opt</sub> from <i>C. acetobutylicum</i> ATCC 824                                                                                                                               | Present study |
| pACYC/yiaY                                                               | pACYCDuet-1 harboring <i>yiaY</i> from <i>E. coli</i> MG1655                                                                                                                                                                          | Present study |
| pACYC/aceEF-lpd <sub>101</sub>                                           | pACYCDuet-1 harboring <i>aceEF-lpd</i> <sub>101</sub> operon from <i>E. coli</i> SE2378                                                                                                                                               | Present study |
| pACYC /fdh1 <sub>sc</sub> /adhE <sub>opt</sub>                           | pACYCDuet-1 harboring codon-optimized <i>fdh1</i> from <i>S. cerevisiae</i> , and codon-optimized <i>adhE</i> <sub>opt</sub> from <i>C. acetobutylicum</i> ATCC 824                                                                   | Present study |
| pACYC /fdh1 <sub>sc</sub> /aceEF-lpd <sub>101</sub> /adhE <sub>opt</sub> | pACYCDuet-1 harboring codon-optimized <i>fdh1</i> from <i>S. cerevisiae</i> , <i>aceEF-lpd</i> <sub>101</sub> operon from <i>E. coli</i> SE2378 and codon-optimized <i>adhE</i> <sub>opt</sub> from <i>C. acetobutylicum</i> ATCC 824 | Present study |
| pACYC /fdh1 <sub>sc</sub> /aceEF-lpd <sub>101</sub>                      | pACYCDuet-1 harboring codon-optimized <i>fdh1</i> from <i>S. cerevisiae</i> , and <i>aceEF-lpd</i> <sub>101</sub> operon from <i>E. coli</i> SE2378                                                                                   | Present study |
| pACYC /fdh1 <sub>cb</sub> /adhE <sub>opt</sub>                           | pACYCDuet-1 harboring codon-optimized <i>fdh1</i> from <i>C. boidinii</i> , and codon-optimized <i>adhE</i> <sub>opt</sub> from <i>C. acetobutylicum</i> ATCC 824                                                                     | Present study |
| pCOLADuet-1                                                              | COLA <i>ori</i> , <i>lacI</i> , <i>T7lac</i> , Kan <sup>R</sup>                                                                                                                                                                       | Novagen       |
| pCOLA/thrA <sup>fr</sup> BC/ilvA <sup>fr</sup>                           | pCOLADuet-1 harboring <i>thrA</i> <sup>G1297A</sup> BC operon from <i>E. coli</i> ATCC 21277, and <i>ilvA</i> <sup>fr</sup> from <i>C. glutamicum</i> ATCC 13032                                                                      | (5)           |

- Fischer CR, Tseng HC, Tai M, Prather KL, Stephanopoulos G (2010) Assessment of heterologous butyrate and butanol pathway activity by measurement of intracellular pathway intermediates in recombinant *Escherichia coli*. *Appl Microbiol Biotechnol* 88(1):265–275.
- Tseng H-C, Martin CH, Nielsen DR, Prather KLJ (2009) Metabolic engineering of *Escherichia coli* for the enhanced production of (R)- and (S)-3-hydroxybutyrate. *Appl Environ Microbiol* 75(10):3137–3145.
- Nielsen DR, et al. (2009) Engineering alternative butanol production platforms in heterologous bacteria. *Metab Eng* 11(4-5):262–273.
- Martin CH (2010) Development of metabolic pathways for the biosynthesis of hydroxyacids and lactones. PhD dissertation (Massachusetts Institute of Technology, Cambridge, MA). Available at <http://hdl.handle.net/1721.1/57867>.
- Tseng HC, Harwell CL, Martin CH, Prather KL (2010) Biosynthesis of chiral 3-hydroxyvalerate from single propionate-unrelated carbon sources in metabolically engineered *E. coli*. *Microb Cell Fact* 9:96.

**Table S3. List of DNA oligonucleotides used in this work**

| Primer                       | Sequence 5'→3'                                | Source        |
|------------------------------|-----------------------------------------------|---------------|
| crt-FP-BamHI                 | ATTAGGATCCAGGAGGATTAGTCATGGAAC                | Sigma-Genosys |
| crt-RP-NotI                  | ATTAGCGGCCGCAAACCTACCTCTATCTATTTTTG           | Sigma-Genosys |
| crt-FP-MfeI                  | TAACAATTGGGAGGATTAGTCATGG                     | Sigma-Genosys |
| crt-RP-XhoI                  | ATTCTCGAGTACCTCCTATCTATTTTTG                  | Sigma-Genosys |
| phaJ1-FP-BamHI               | ATAGGATCCAGGGGAGAGAACATGAGCCAGGTCCAGAAC       | Sigma-Genosys |
| phaJ1-RP-NotI                | ATAGCGGCCGCTCAGCCGATGCTGATCGG                 | Sigma-Genosys |
| phaJ1-FP-NdeI                | ATACATATGAGGGGAGAGAACATGAGCCAGGTCCAGAAC       | Sigma-Genosys |
| phaJ1-RP-AvrII               | ATACCTAGGTCAGCCGATGCTGATCGG                   | Sigma-Genosys |
| bcd-FP-BamHI                 | ATTAGGATCCAAGGAGAGTTTATATGGATTTAATTTAAC       | Sigma-Genosys |
| bcd-RP-NotI                  | ATTAGCGGCCGCAATTTATCTTAATTATTAGCAGC           | Sigma-Genosys |
| fdh1 <sub>sc</sub> -FP-BamHI | ATAGGATCCAGGGGATATCATATGATGTCCAAAGGCAAAG      | Sigma-Genosys |
| fdh1 <sub>sc</sub> -RP-SalI  | ATAGTCGACCCTAGGTTATTTTTCTGACCATACG            | Sigma-Genosys |
| fdh1 <sub>cb</sub> -FP-BamHI | ATAGGATCCAGGGGATATCATATGATGAAAATCGTGCTGG      | Sigma-Genosys |
| fdh1 <sub>cb</sub> -RP-SalI  | ATAGTCGACCCTAGGTCATTTTTGTCTGTGTTT             | Sigma-Genosys |
| pct-FP-XhoI                  | ATACTCGAGAGGGGAGAATTCATGAGAAAAGTAGAAATC       | Sigma-Genosys |
| pct-RP-AvrII                 | ATACCTAGGACCTGCAGTTATTTTTTCAGT                | Sigma-Genosys |
| bktB-FP-EcoRI                | ATAGAATTCAGGGGAAAAGTCATGACGCGTGAAGTGG         | Sigma-Genosys |
| bktB-RP-HindIII              | ATAAAGCTTAACCTCAGATACGCTCGAAGATGG             | Sigma-Genosys |
| aceE-FP-SalI                 | ATTAGTCGACAAGGAGATATTATATGTGCAAGCTTCCAAATGACG | Sigma-Genosys |
| lpd101-RP-NotI               | ATTAGCGGCCGCTTACTTCTTCTTCGCTTTCGGGTTT         | Sigma-Genosys |
| yiaY-FP-AatII                | ATTAGACGTCAAGGAGATATTATATGGCAGCTTCAACGTTCTT   | Sigma-Genosys |
| yiaY-RP-AvrII                | ATTACCTAGGCCGTTGTGGAAATGATGATTAC              | Sigma-Genosys |
| hbd-FP-NdeI                  | ATTCATATGAAAAAGGTATGTGTTATAGG                 | Sigma-Genosys |
| hbd-RP-XbaI                  | ATTTCTAGAACTTATTTTGAATAATCGTAG                | Sigma-Genosys |
| phaB-FP-MfeI                 | ATTCAAATTGACGAAGCCAATCAAGGAG                  | Sigma-Genosys |
| phaB-RP-AvrII                | ATTCCTAGGGGTGAGCCCATATGACG                    | Sigma-Genosys |
| C-FP-tesB (for colony PCR)   | TTTCTCTTATTATCAATGCACC                        | Sigma-Genosys |
| C-RP-tesB (for colony PCR)   | CATTTATCGGCTACAAATTGG                         | Sigma-Genosys |
| C-FP-mdh (for colony PCR)    | GCGACTGTTAATTACGTAAGTTAGG                     | Sigma-Genosys |
| C-RP-mdh (for colony PCR)    | CCCTGTAGTAGTGATGCGTG                          | Sigma-Genosys |

Restriction sites used for cloning are underlined. Primer names correspond to the name of the gene that the primer amplifies, whether the primer is the forward primer (FP) or reverse primer (RP) of that gene, and the restriction site incorporated into the primer sequence for cloning.
